# Supplementary material
Source: PubMed Central journal article supplement (PMC2777269)
Supplement: NIHMS28031-supplement-S1.pdf [file NIHMS28031-supplement-S1.pdf]

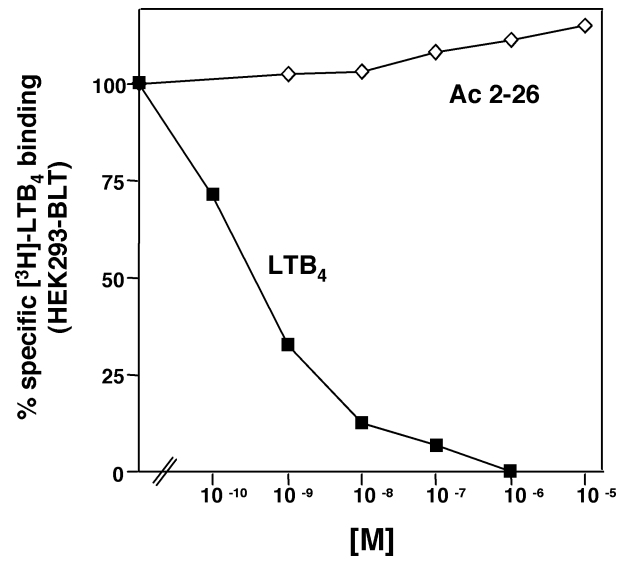

**Supplementary Fig. A** Competitive [<sup>3</sup>H]LTB<sub>4</sub> binding. Human BLT-transfected HEK293 cells ( $0.5 \times 10^6$  cells/incubation) were incubated with [<sup>3</sup>H]LTB<sub>4</sub> in the presence of an increasing concentration of unlabeled compounds. After incubation for 40 min at 4 °C, bound and unbound radioligands were separated by filtration and specific binding was determined. Results represent the mean from duplicates of  $n = 2$ .
