# Supplementary material
Source: PubMed Central journal article supplement (PMC2777269)
Supplement: NIHMS28031-supplement-S2.pdf [file NIHMS28031-supplement-S2.pdf]

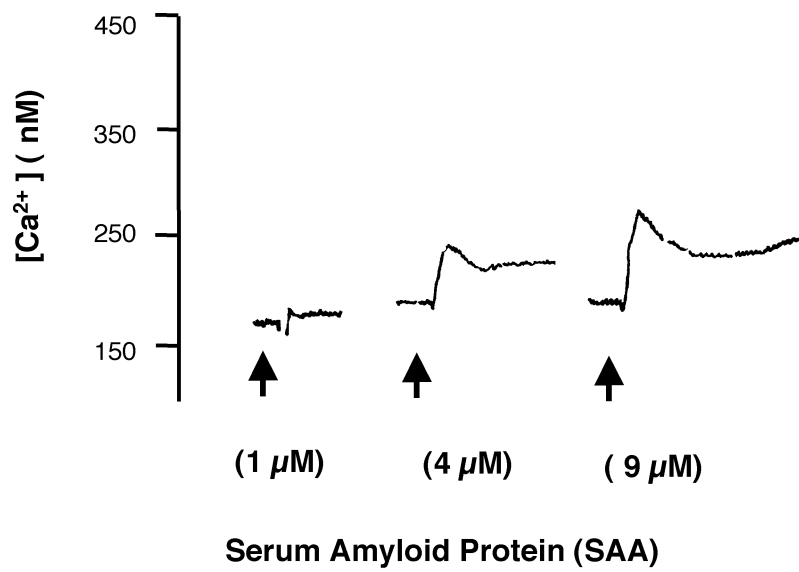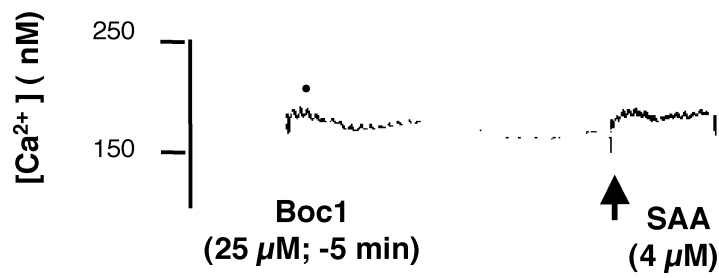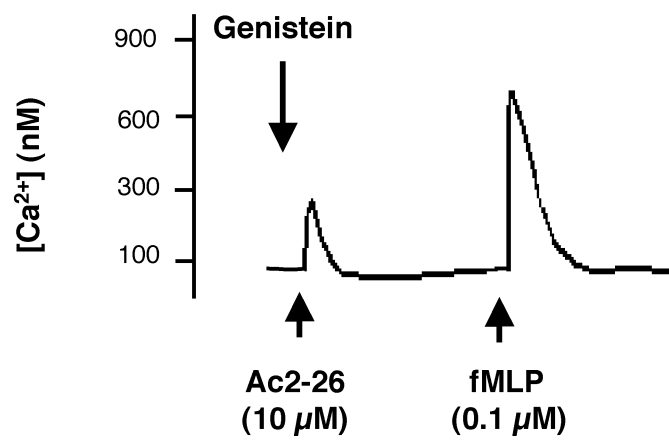

**Supplementary Fig. B** Intracellular calcium mobilization assay in human neutrophils. Fura2-AM-loaded human PMNs ( $5 \times 10^6$  cells/incubation) were incubated with the ALXR/FPRL1 selective agonist SAA (*a* and *b*) to produce rapid changes in intracellular  $[Ca^{2+}]$  as measured by fluorimetry. *a*, Concentration-dependent response to SAA. *b*, Pretreatment of Boc1 (N-t-BOC-Met-Leu-Phe) antagonizes SAA effect. *c*, Reduced intracellular  $[Ca^{2+}]$  to Ac2-26 following cell incubation with 10  $\mu$ M genistein (see text and Fig. 3*d* for more details). In all cases traces are representative of three independent experiments.
