# Supplementary material
Source: PubMed Central journal article supplement (PMC2777269)
Supplement: NIHMS28031-supplement-S3.pdf [file NIHMS28031-supplement-S3.pdf]

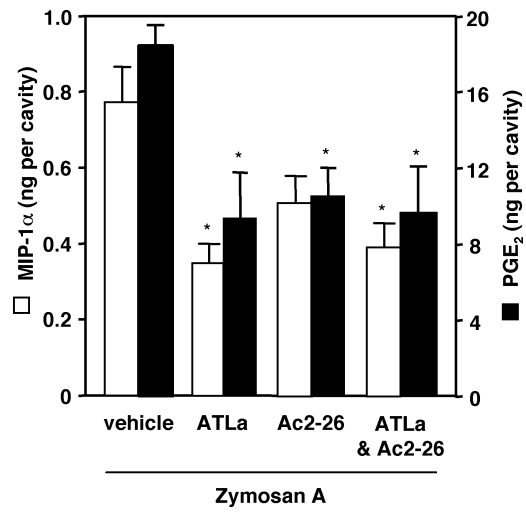

**Supplementary Fig. C** ANXA1-derived peptides and ATLa inhibit endogenous mediator generation *in vivo*. Animals were treated i.v. with PBS (vehicle), ATLa (5  $\mu$ g, ~12 nmol), Ac2-26 (100  $\mu$ g, ~33 nmol) or both ATLa and Ac2-26 15 min prior to local injection of Zymosan A. MIP-1 $\alpha$  ( $\square$ ) and PGE<sub>2</sub> ( $\blacksquare$ ) levels in cell-free supernatants (*c*) were determined at the 4 h time-point. Data are mean  $\pm$  s.e.m. of 8 mice per group. \*  $P < 0.05$  versus Zymosan A alone.
